# Supplementary material
Source: PubMed Central journal article supplement (PMC8132175)

### Legend

groups    low region expression    high region expression  
statistics     $p \geq 0.05$     \*  $p < 0.05$     \*\*  $p < 0.01$     \*\*\*  $p < 0.001$

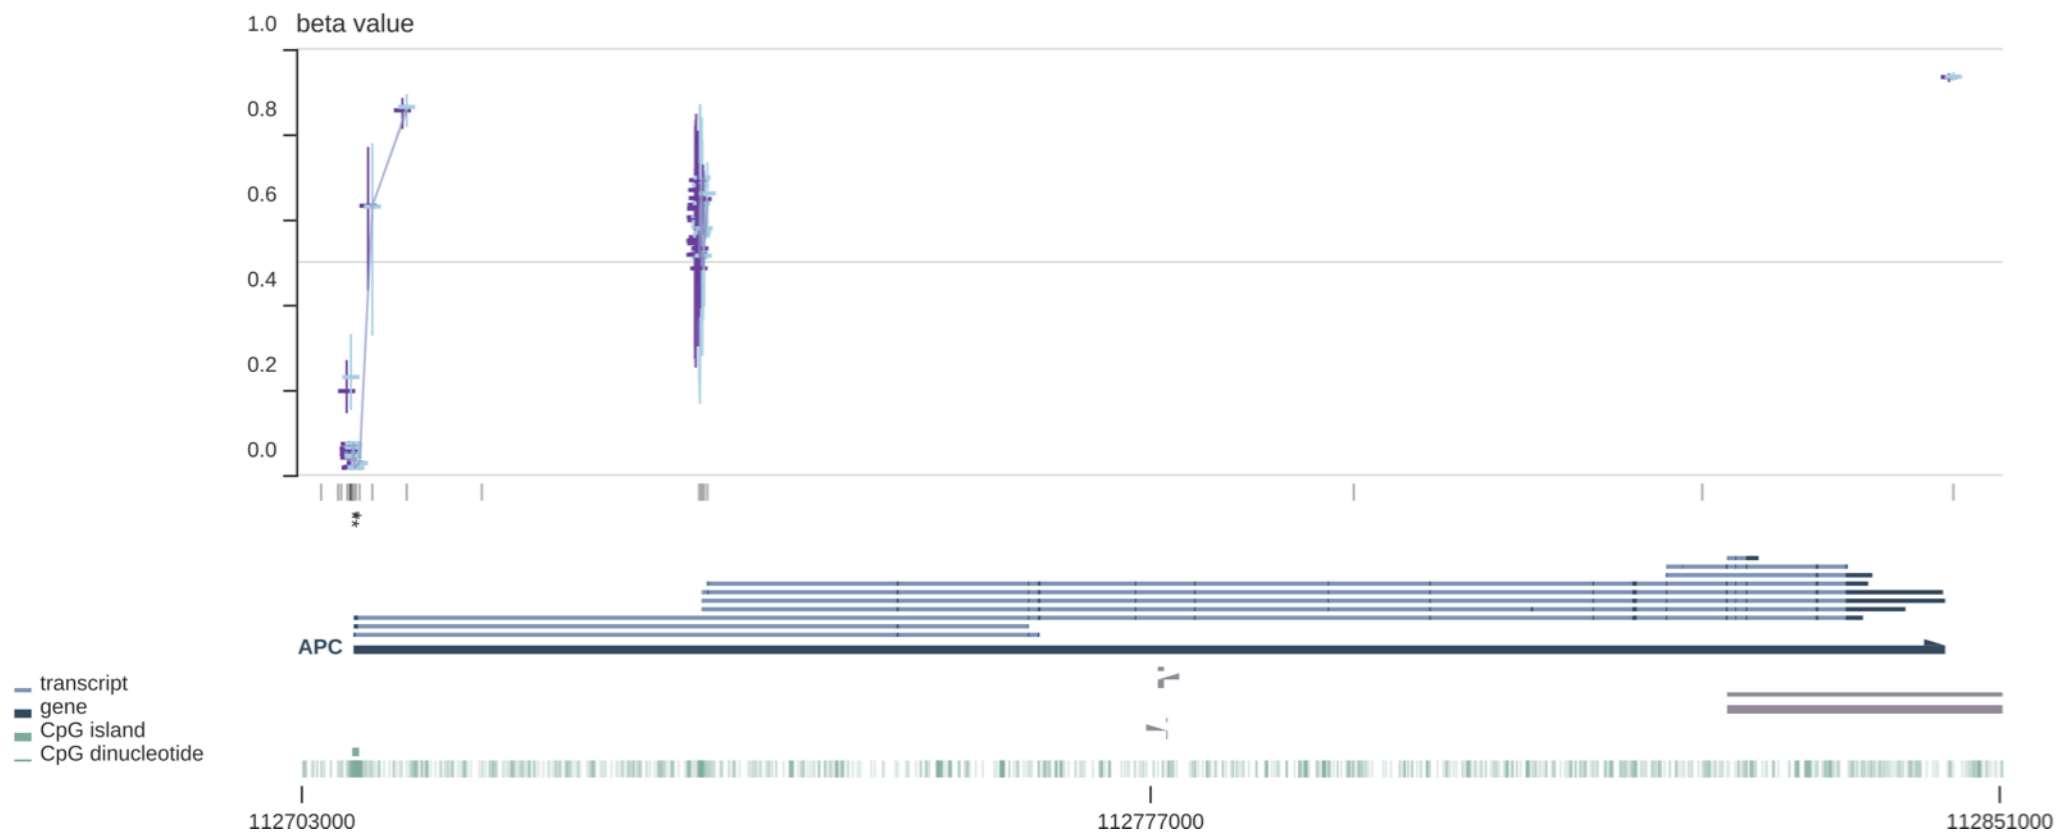

Supplement: mmc1.pdf [file mmc1.pdf]

**A**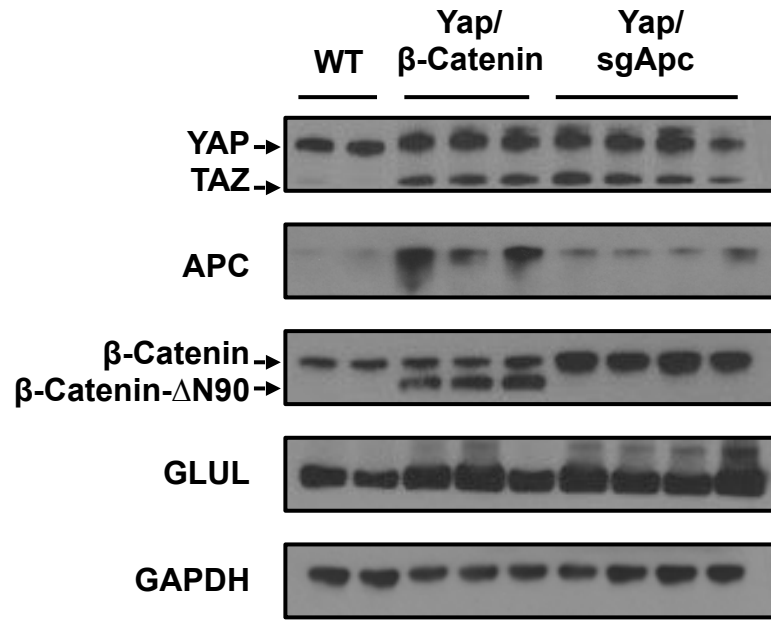**B**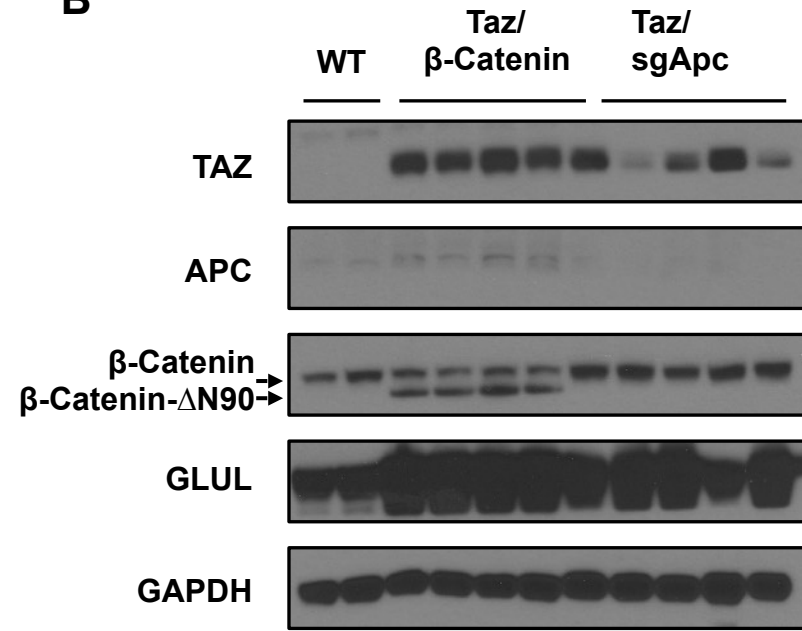**C**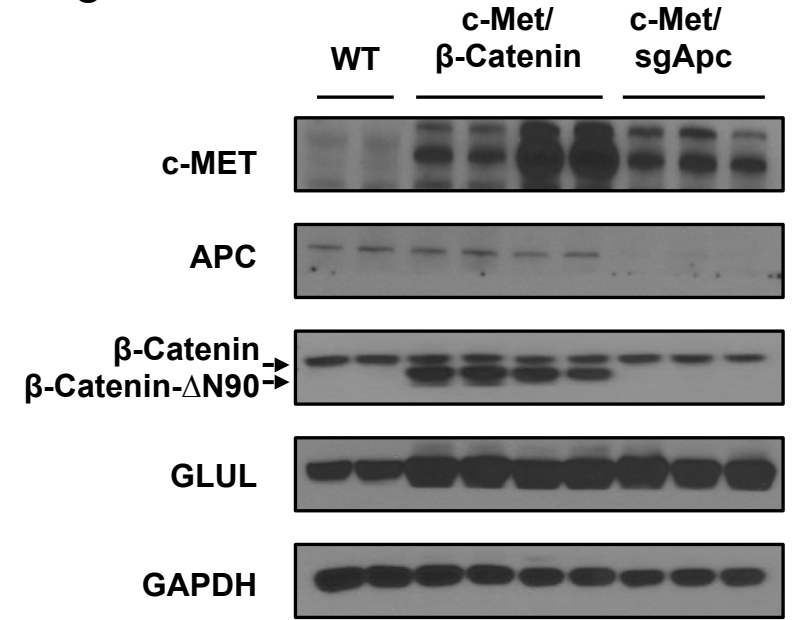

Supplement: mmc2.pdf [file mmc2.pdf]

Taz/sgApc 6 w.p.i

Taz/sgApc 10 w.p.i

H&E (40x)

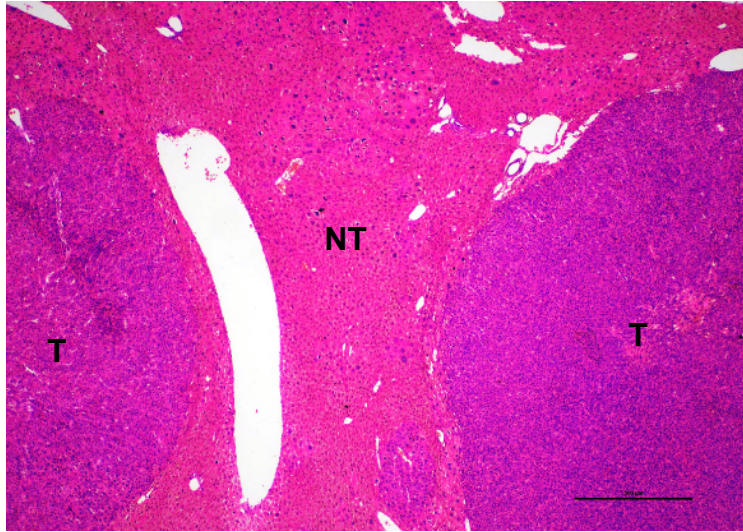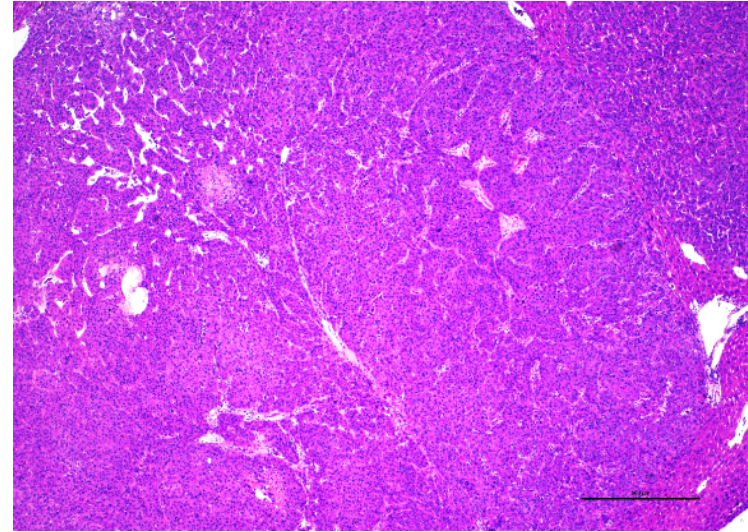

H&E (200x)

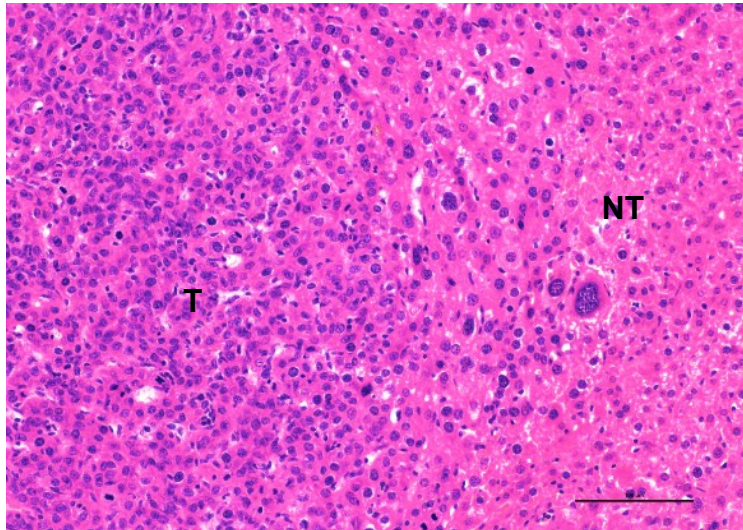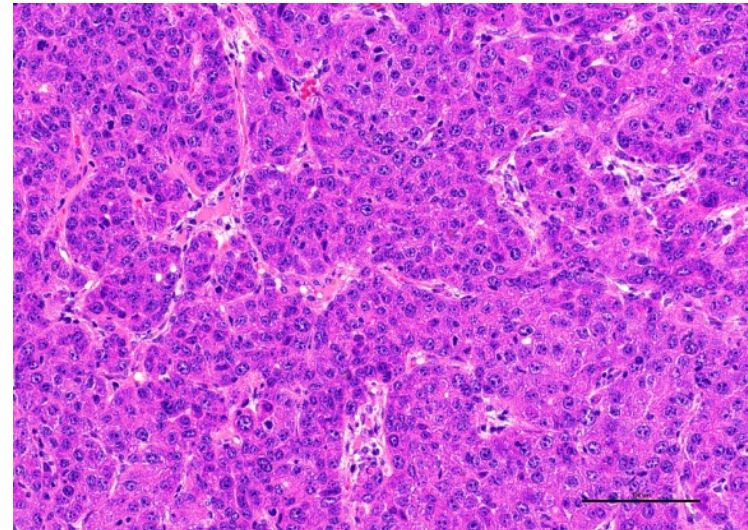

Supplement: mmc3.pdf [file mmc3.pdf]

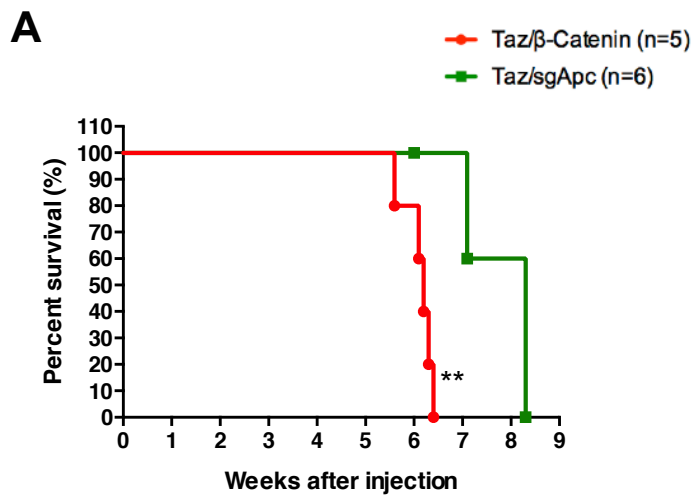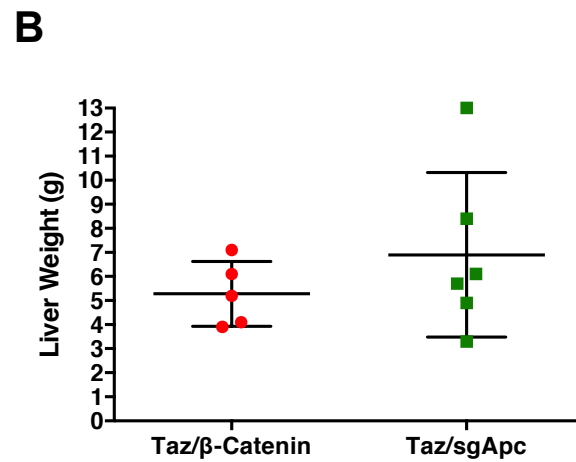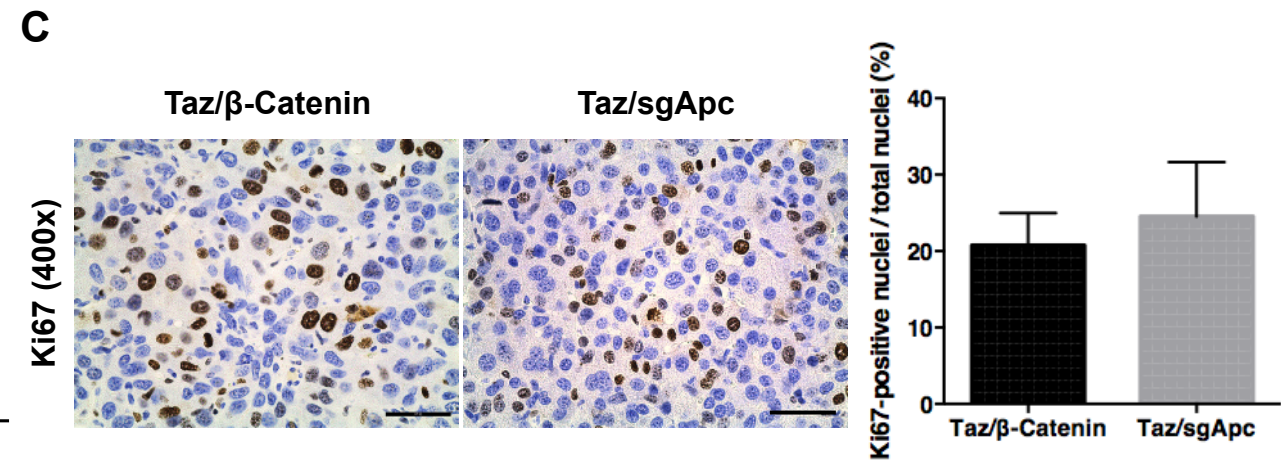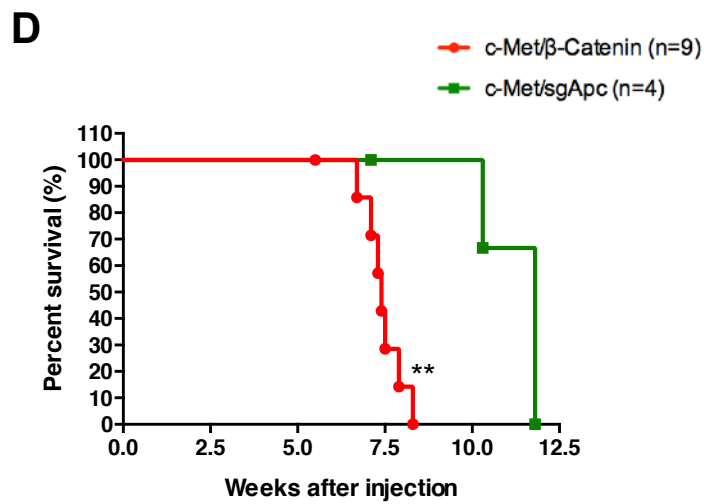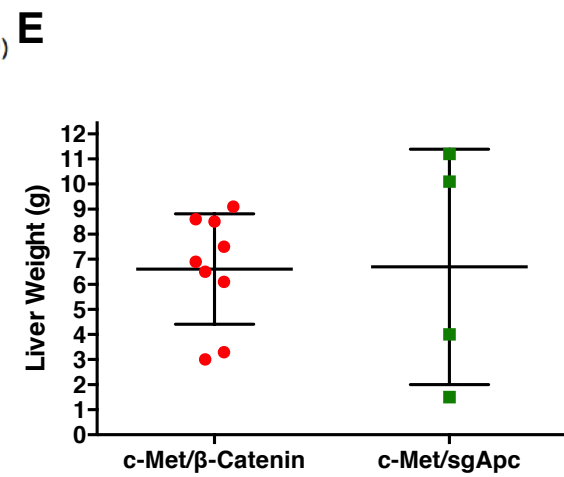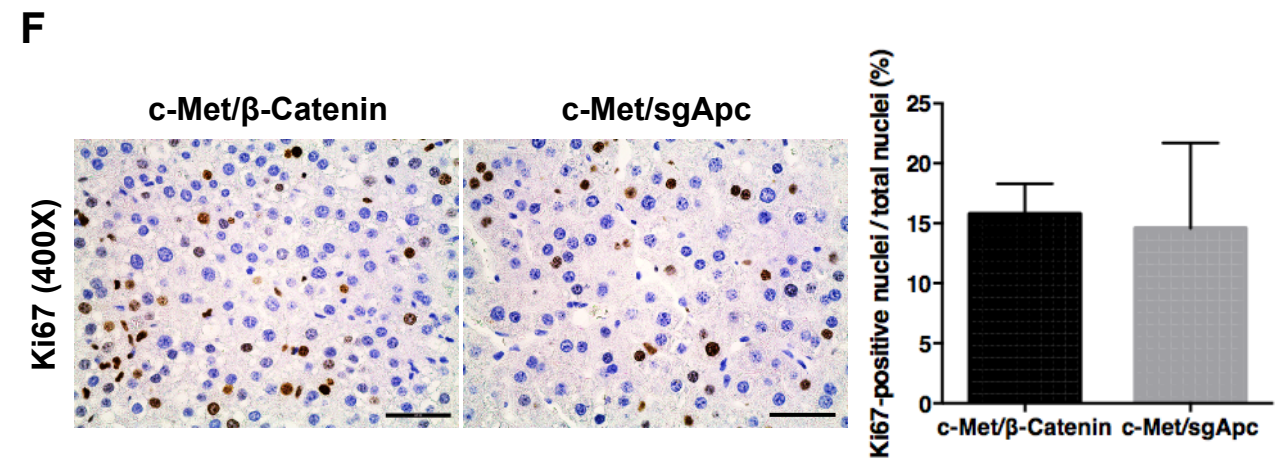

Supplement: mmc4.pdf [file mmc4.pdf]

**A****FVB WT** **$\beta$ -Catenin (100x)**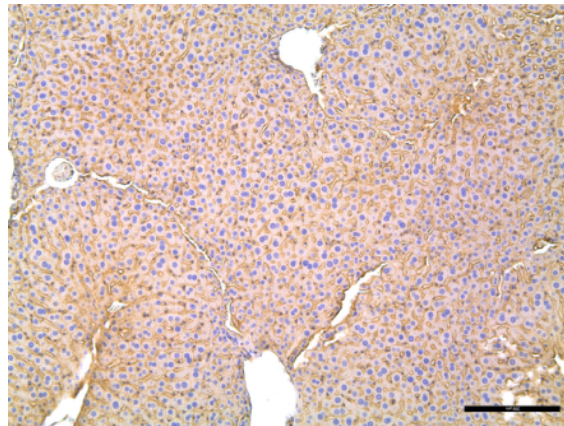**C****GLUL (100x)**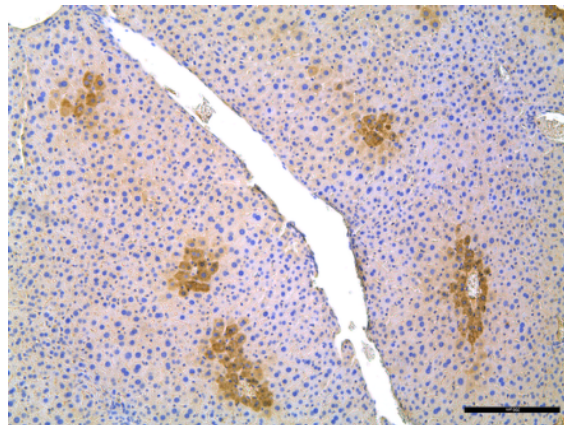**B****FVB Yap/ $\beta$ -Catenin**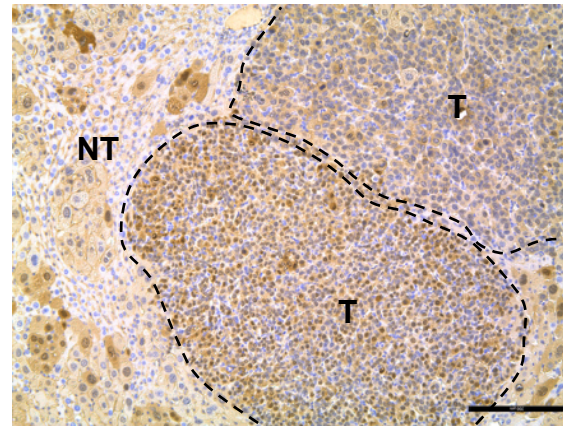**D**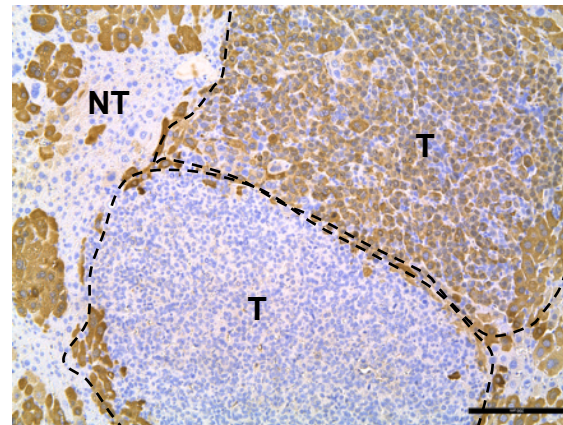**FVB Yap/sgApc**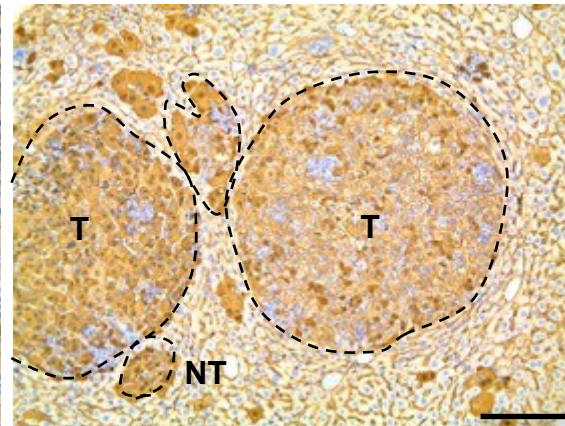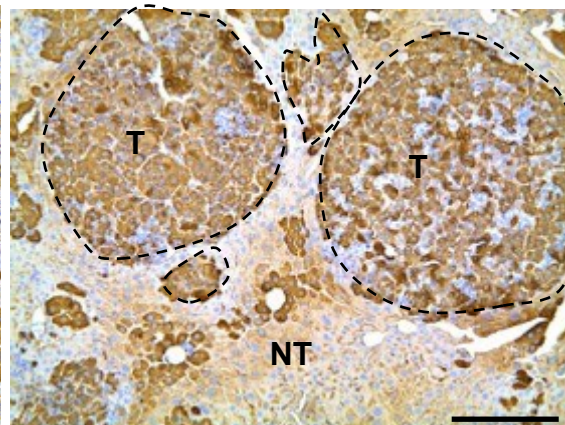

Supplement: mmc5.pdf [file mmc5.pdf]

**A****FVB Taz/ $\beta$ -Catenin****FVB Taz/sgApc** **$\beta$ -Catenin (100x)**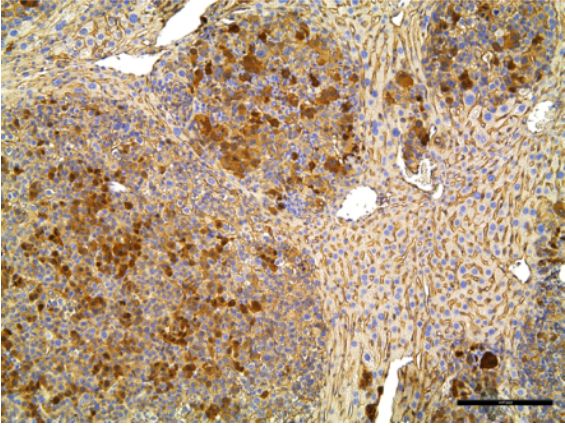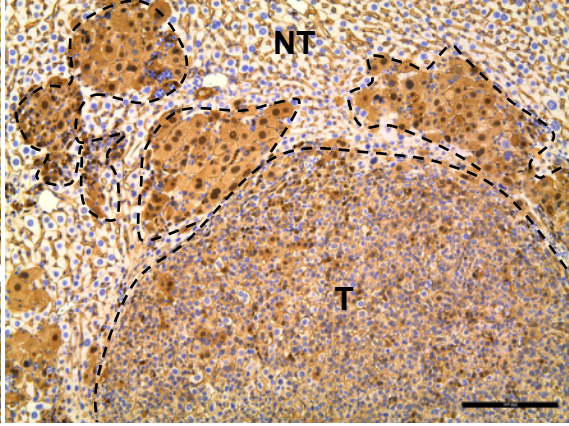**C****GLUL (100x)**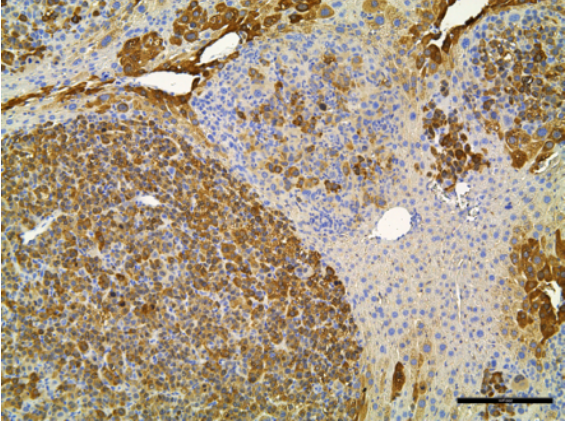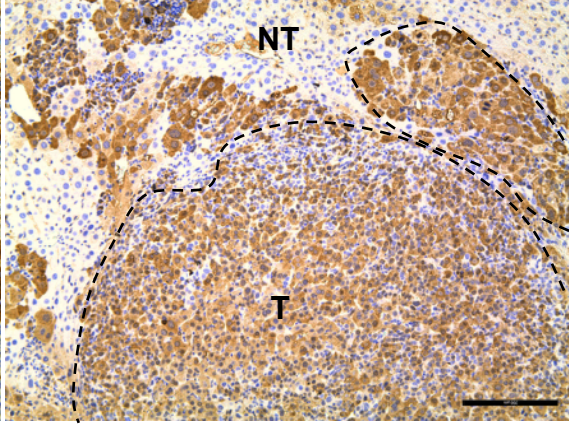**B****FVB c-Met/ $\beta$ -Catenin****FVB c-Met/sgApc**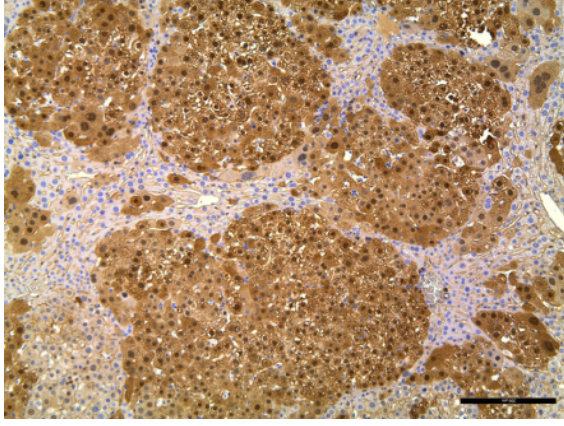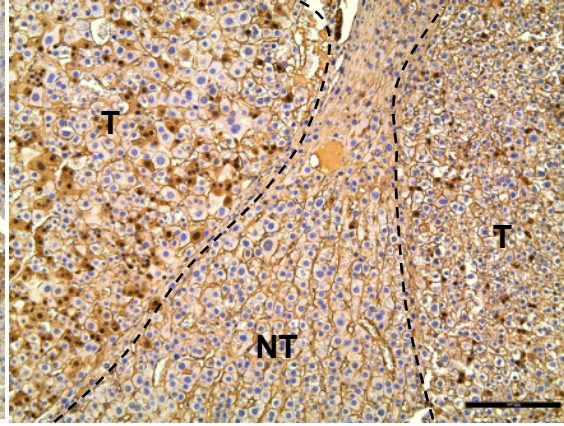**D**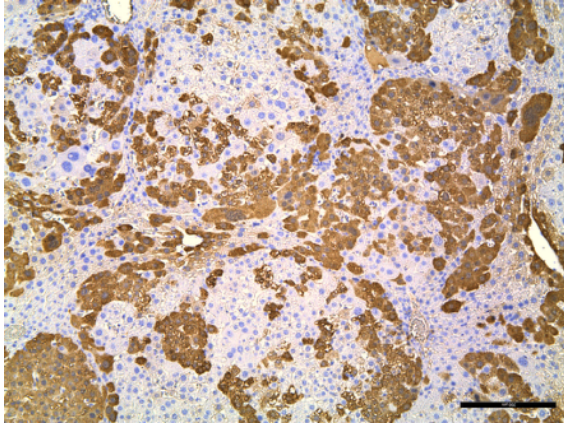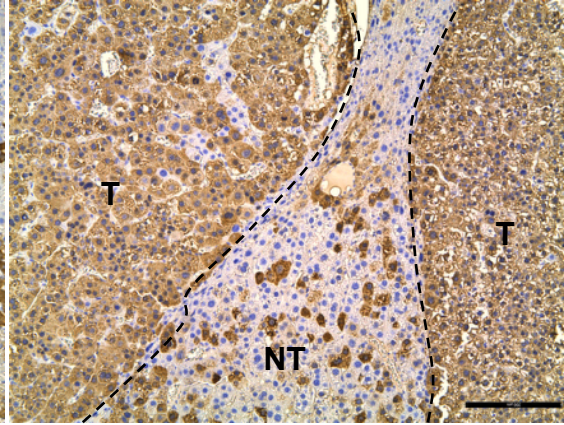

Supplement: mmc6.pdf [file mmc6.pdf]

**$\beta$ -Catenin (100x)**

**GLUL (100x)**

**p-mTOR-Ser2448 (100x)**

**Yap/ $\beta$ -Catenin**

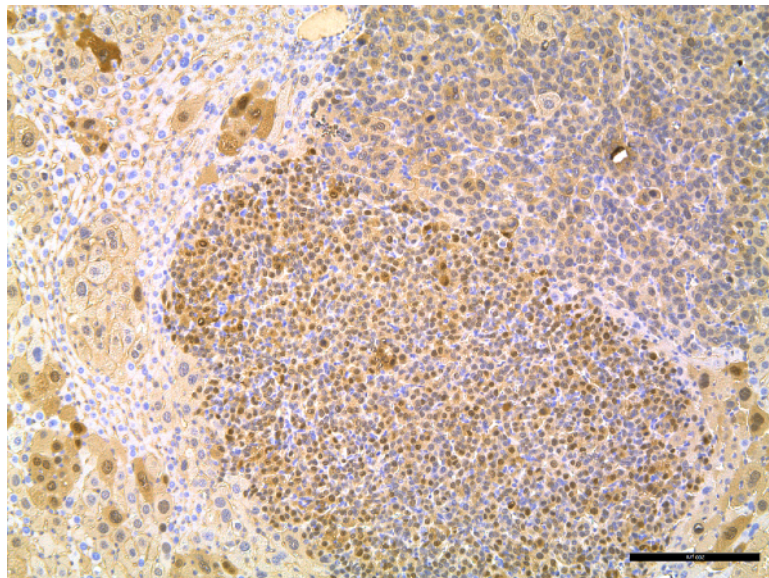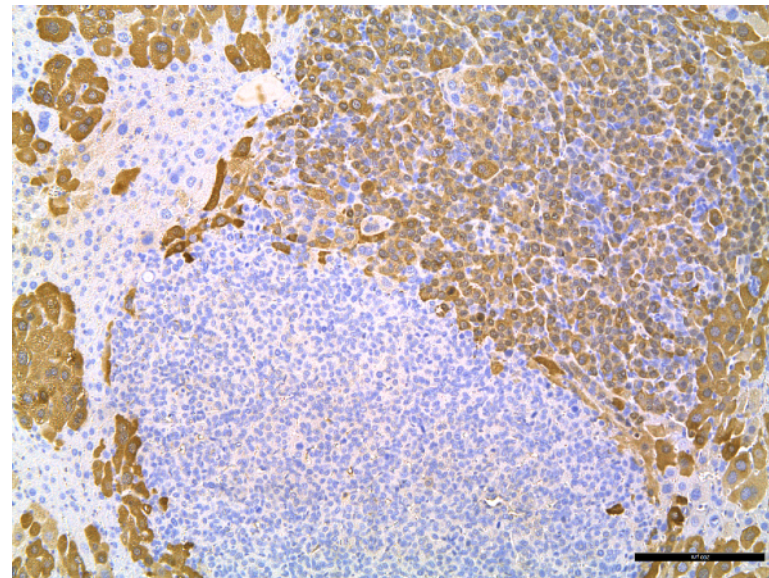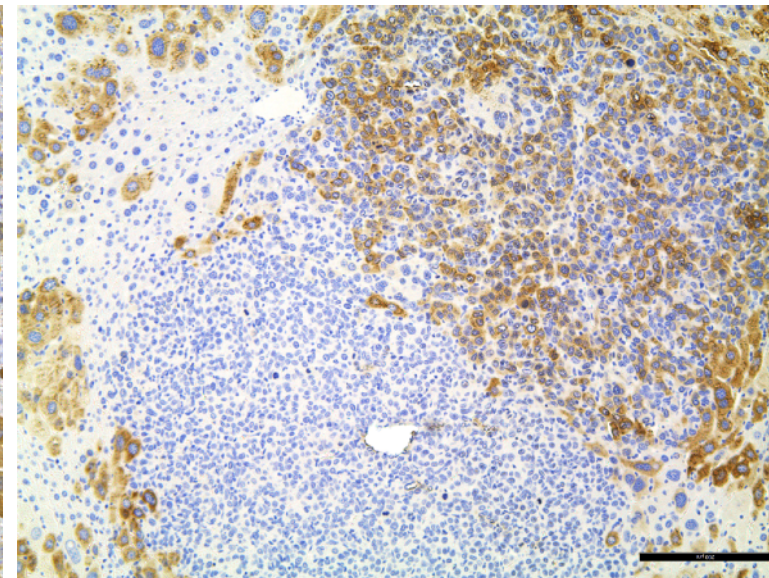

**Yap/sgApc**

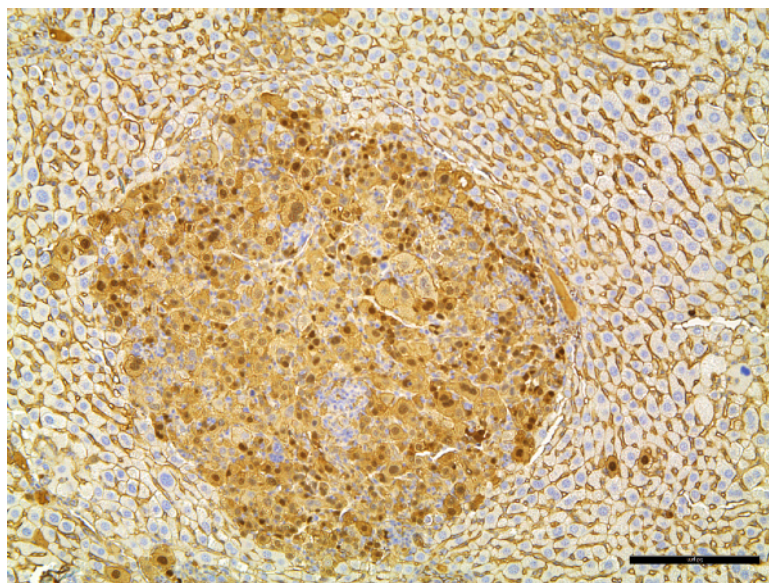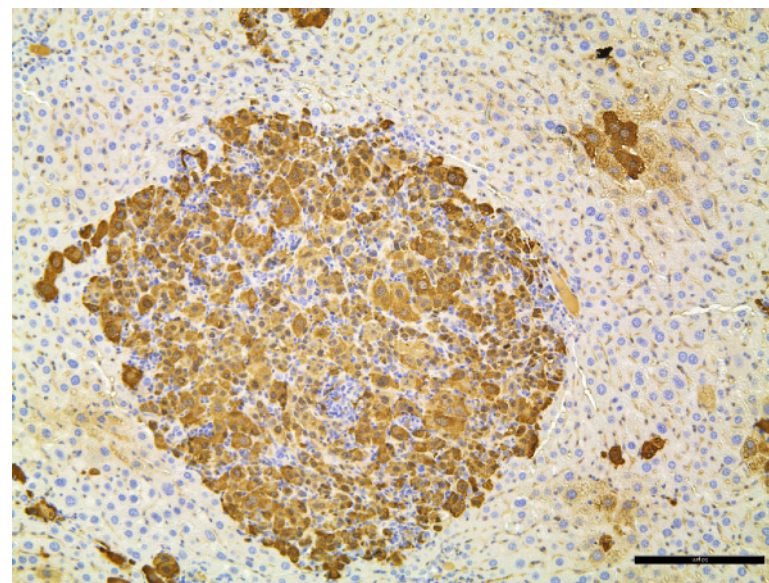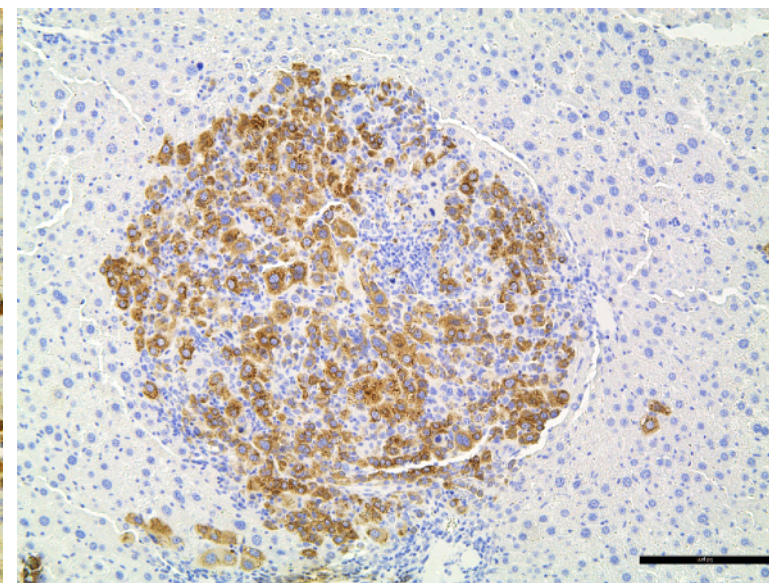

Supplement: mmc7.pdf [file mmc7.pdf]

$\beta$ -Catenin (100X)

GLUL (100X)

p-mTOR-Ser2448 (100X)

c-Met/ $\beta$ -Catenin

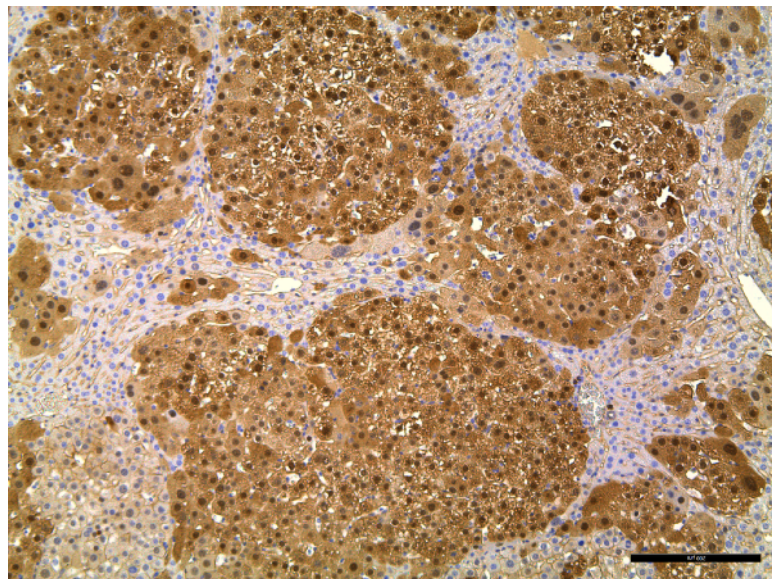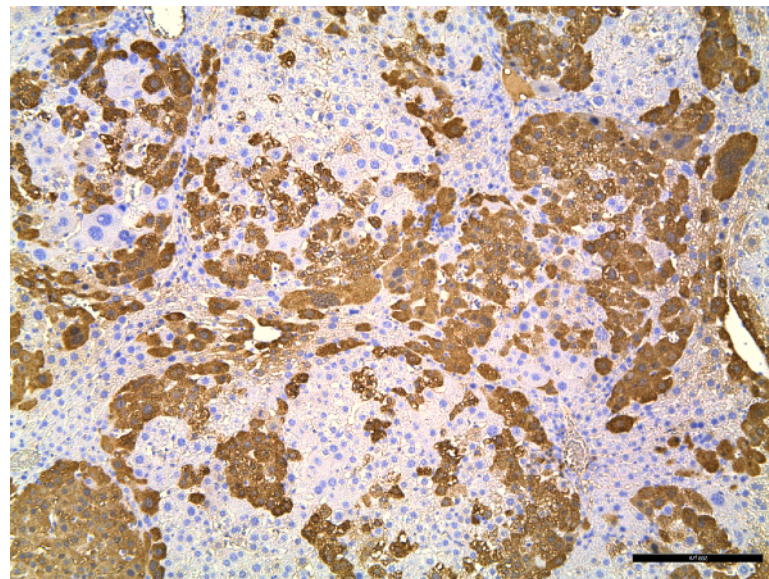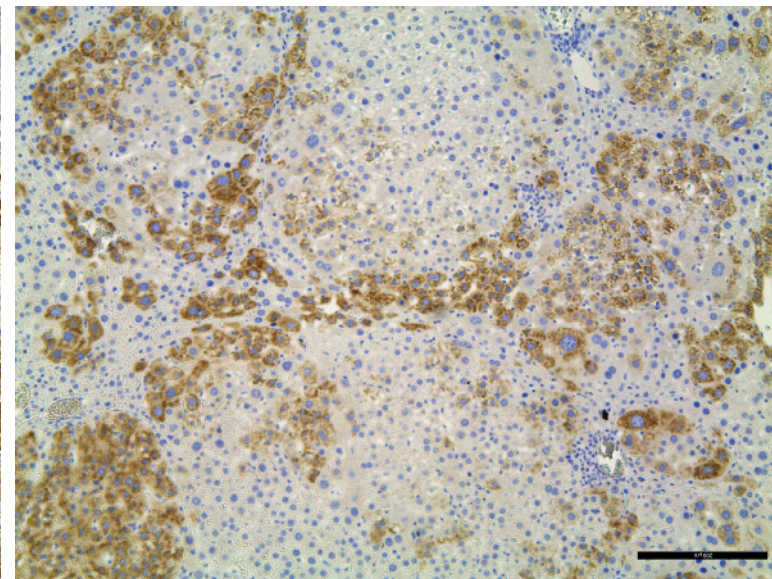

c-Met/sgApc

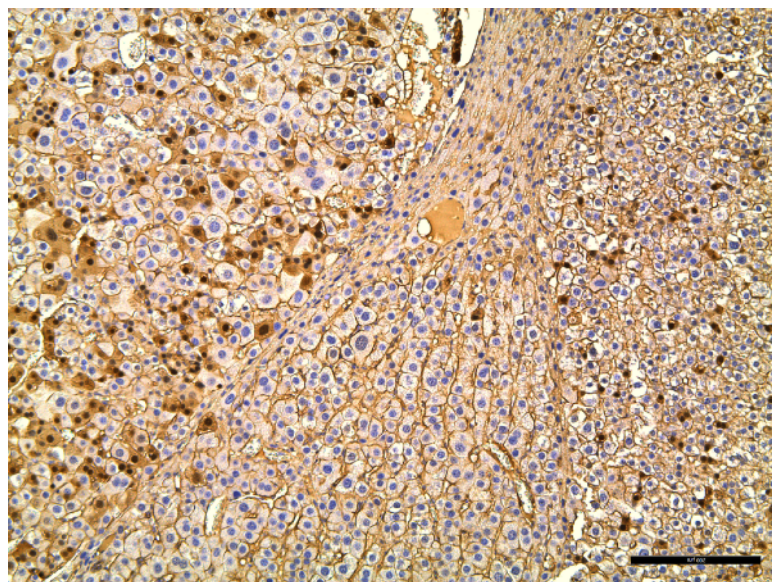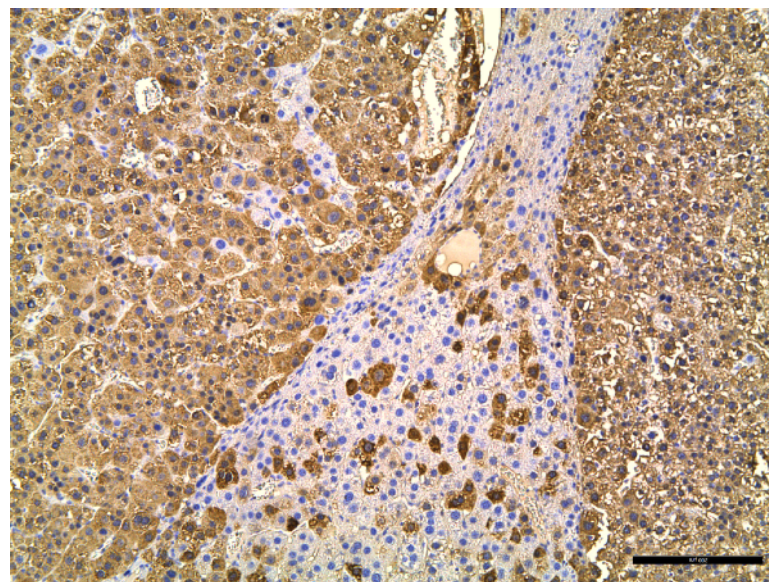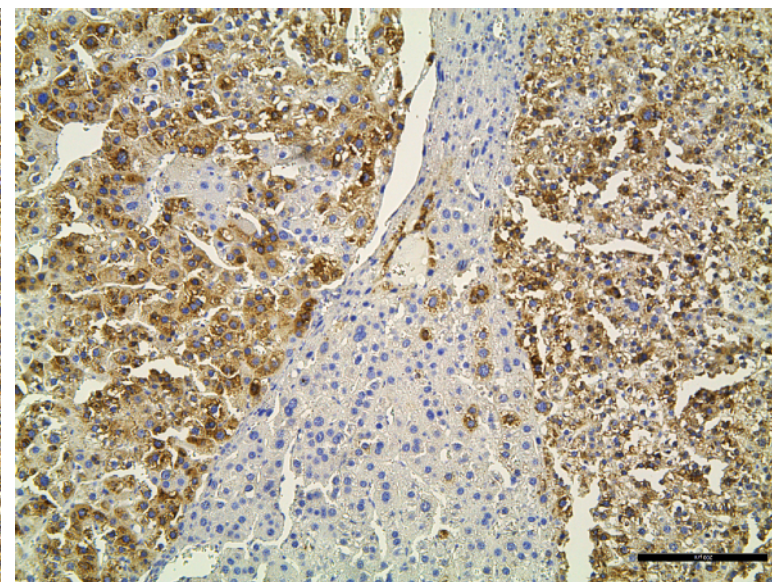

Supplement: mmc8.pdf [file mmc8.pdf]
